# Supplementary material for: Sedimentary ancient DNA reveals a threat of warming-induced alpine habitat loss to Tibetan Plateau plant diversity
Source: PubMed Central journal article supplement (PMC8137883; doi:10.1038/s41467-021-22986-4), 2021-05-20
Supplement: 41467_2021_22986_MOESM1_ESM.pdf [file 41467_2021_22986_MOESM1_ESM.pdf]

# **Sedimentary ancient DNA reveals a threat of warming-induced alpine habitat loss to Tibetan Plateau plant diversity**

## **Supplementary Information**

Sisi Liu<sup>1,2</sup>, Stefan Kruse<sup>1</sup>, Dirk Scherler<sup>3,4</sup>, Richard H. Ree<sup>5</sup>, Heike H. Zimmermann<sup>1</sup>, Kathleen R. Stoof-Leichsenring<sup>1</sup>, Laura S. Epp<sup>1</sup>, Steffen Mischke<sup>6</sup>, and Ulrike Herzschuh<sup>1,2,7\*</sup>

<sup>1</sup> *Alfred Wegener Institute Helmholtz Centre for Polar and Marine Research, Polar Terrestrial Environmental Systems, Potsdam, Germany*

<sup>2</sup> *Institute of Environmental Science and Geography, University of Potsdam, Potsdam, Germany*

<sup>3</sup> *GFZ German Research Centre for Geosciences, Potsdam, Germany*

<sup>4</sup> *Institute of Geological Sciences, Freie Universität Berlin, Berlin, Germany*

<sup>5</sup> *Negaunee Integrative Research Center, Department of Science and Education, Field Museum, Chicago, USA*

<sup>6</sup> *Institute of Earth Sciences, University of Iceland, Reykjavik, Iceland*

<sup>7</sup> *Institute of Biochemistry and Biology, University of Potsdam, Potsdam, Germany*

### **Supplementary discussion: Contamination in NTC6**

After further sequence filtering (Methods), 32 unique sequence types (53,354 reads) were assigned to terrestrial seed plants in NTC6 in the batch with samples ESL011b-015b and ESL017b-019b. There was no positive gene band in the Agarose gel-electrophoresis, suggesting that the cross-contamination was unlikely to have occurred during the lab work. To check our supposition, we ran a principal component analysis (PCA) of all samples and NTC6. The PCA plot (Supplementary Figure 9) shows a wide difference between the sequence composition of NTC6 and the associated samples (batch 6, red dots), suggesting the origin of the contaminants in NTC 6 is unlikely to have come from this batch. Furthermore, there is no convincing evidence of cross-contamination among samples of batch 6 with batches 4 and 7 which were amplified with the same thermal cycler, as seen by their extremely different compositional taxa. In contrast, these samples were well repeated, as suggested by the similar taxa composition of replicates (e.g., ESL011a-015a and ESL017a-019a vs. ESL011b-015b and

ESL017b-019b, ESL021a-23a vs. ESL021b-23b and ESL028a vs. ESL028b). Taken together, we think that we used a wrong tag combination while pipetting the PCR mix for NTC6 but did not notice. This tag combination is unknown, and we cannot use it for demultiplexing. Because the actual sequence composition does not represent the true NTC for the corresponding PCR batch we did not remove those sequences detected in NTC6 from its controlled samples.

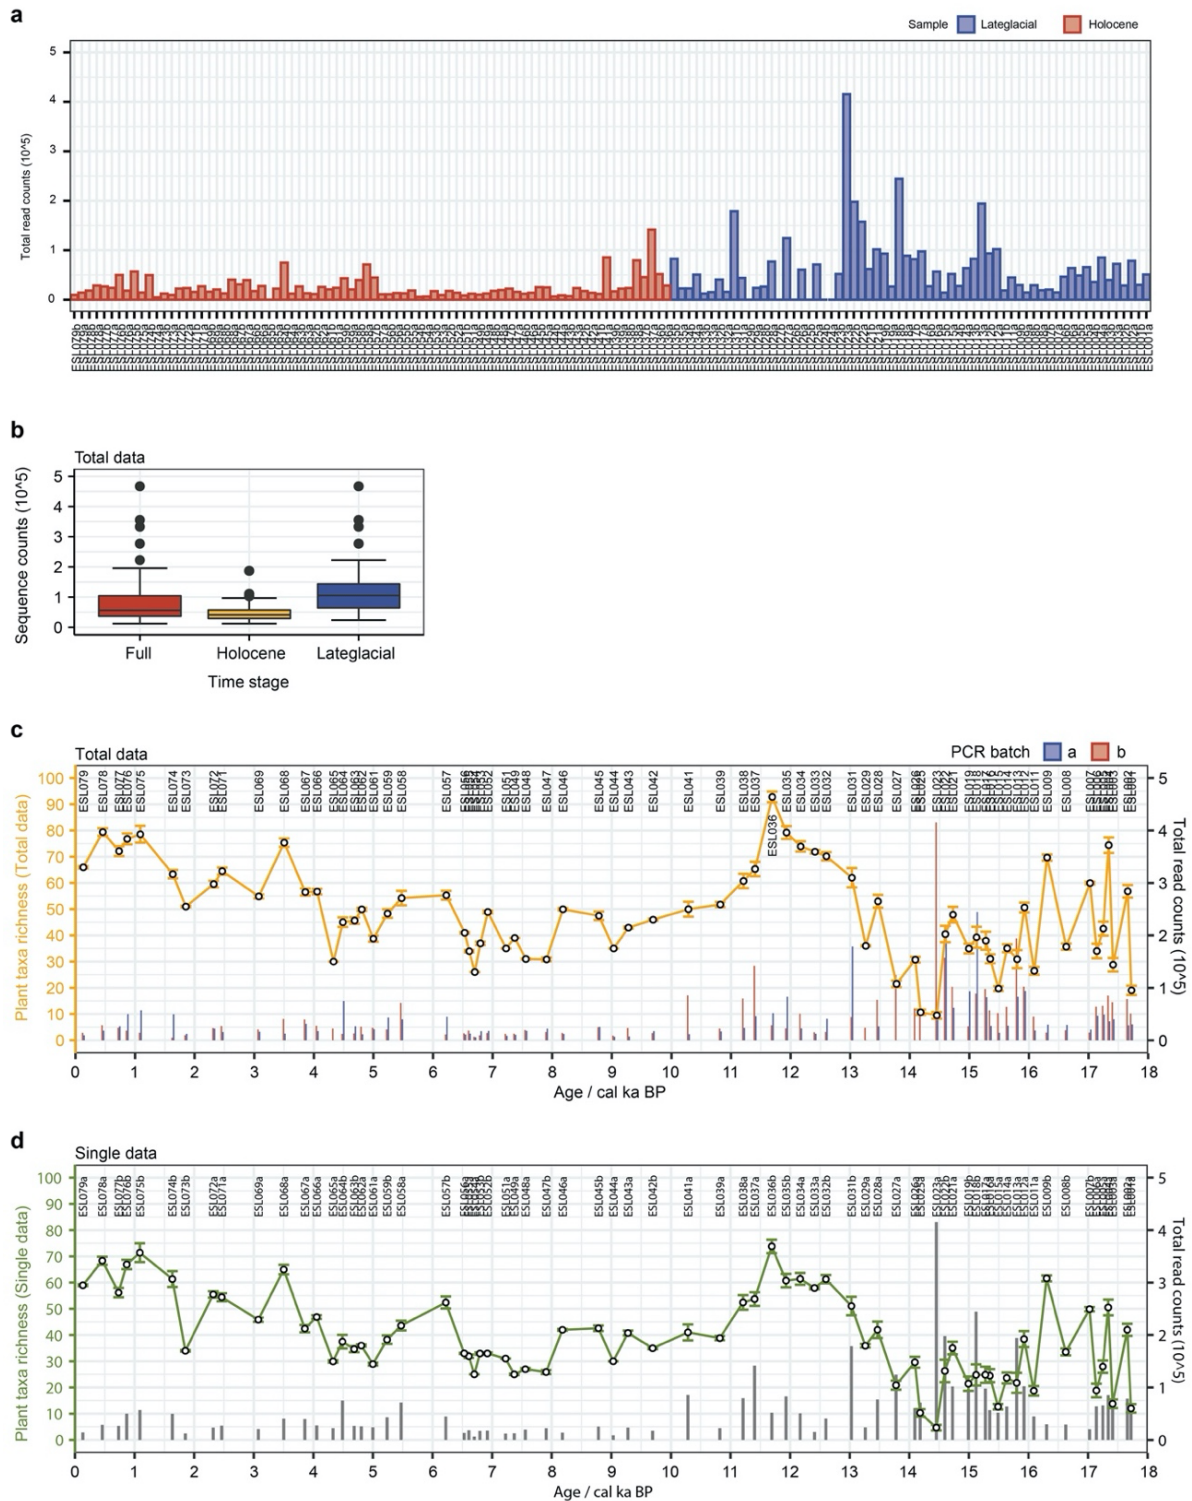

**Supplementary Figure 1 Information about sedaDNA data with 100% best identity and plant taxa richness for sediments of Lake Naleng.** **a**, The total read count of each PCR replicate of the lake-sediment samples. **b**, The box-and-whisker plots show that total read count per lake-sediment sample are comparable. Only a few outliers, marked as individual points, are present. The box plot represents the range of the middle 50% of the data, with a lower limit of 25th percentile, a median value, and an upper limit of 75th percentile. The set of whiskers indicate the date outside the middle 50%, excluding outliers. **c**, Plant taxa richness was calculated based on total data containing all positive PCR replicates (as colour bars indicate,  $n = 138$  PCR replicates of 71 lake-sediment samples). **d**, Plant taxa richness was computed based on single data, consisting of one deeply sequenced PCR product that have a higher total read count within each sample ( $n = 71$  PCR replicates of 71 lake-sediment samples). Before calculation, the sample ESL024 was excluded in both datasets due to no plant sedaDNA in both its PCR replicates. Data are presented as mean  $\pm$  95% confidence interval (error bars) in **c** and **d**. Source data are provided with this paper.

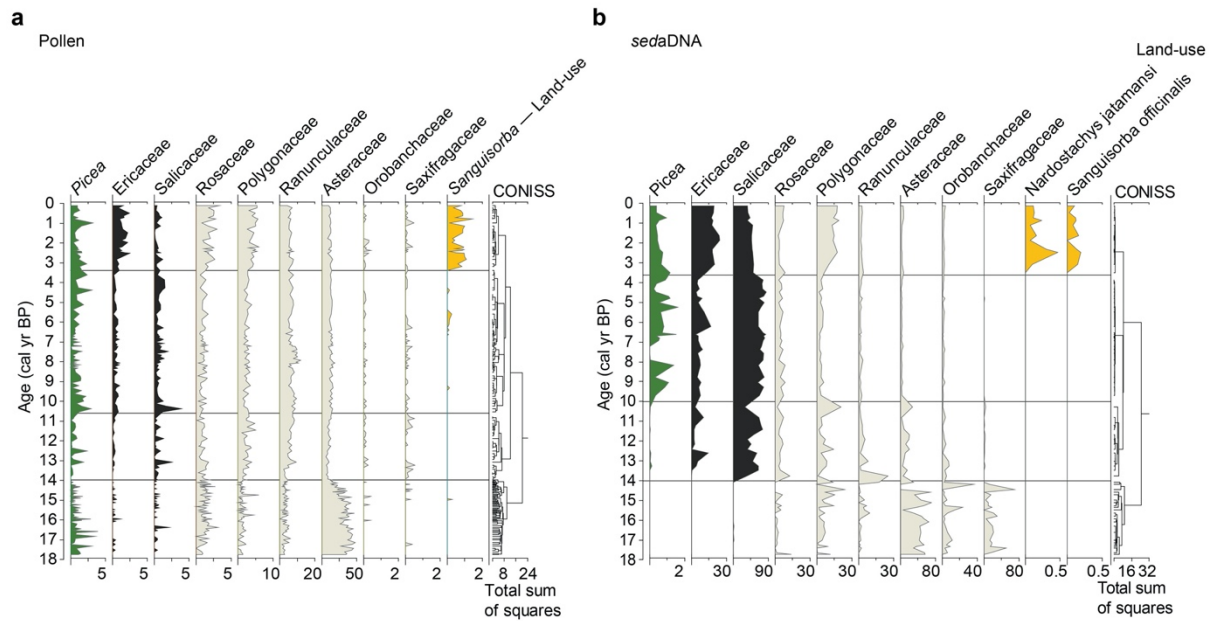

**Supplementary Figure 2 Stratigraphic plots showing the relative (read) abundances of the dominant taxa and land-use indicators from the sediment core of Lake Naleng.** A comparison between (a) pollen and (b) sedaDNA indicates that both proxies capture the major changes. However, differences suggest that the source of sedaDNA is restricted to Lake Naleng's catchment while pollen also comes from lower elevation sites. For example, Ericaceae and *Picea* are not detected before 14 ka, respectively in the sedaDNA record, consistent with the assumed climatic condition, while pollen of these taxa are present throughout the entire record.

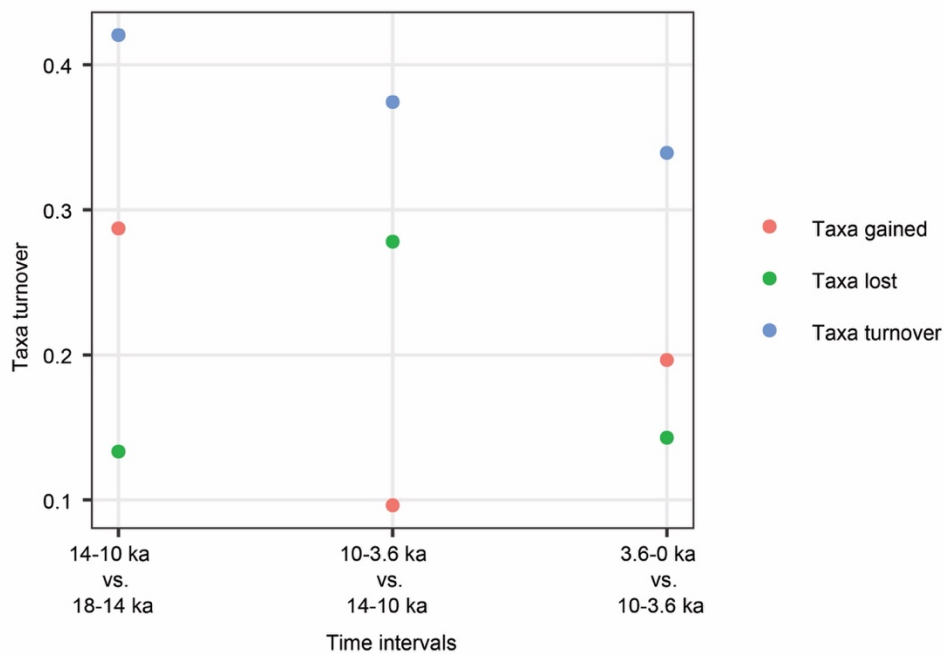

**Supplementary Figure 3 Proportional plant taxa turnover since 18 ka.** Taxa gain is defined as the proportion of immigrants that appear in the lake catchment between the selected time periods, while taxa lost is the proportional disappearance of species. Source data are provided in Supplementary Data 4.

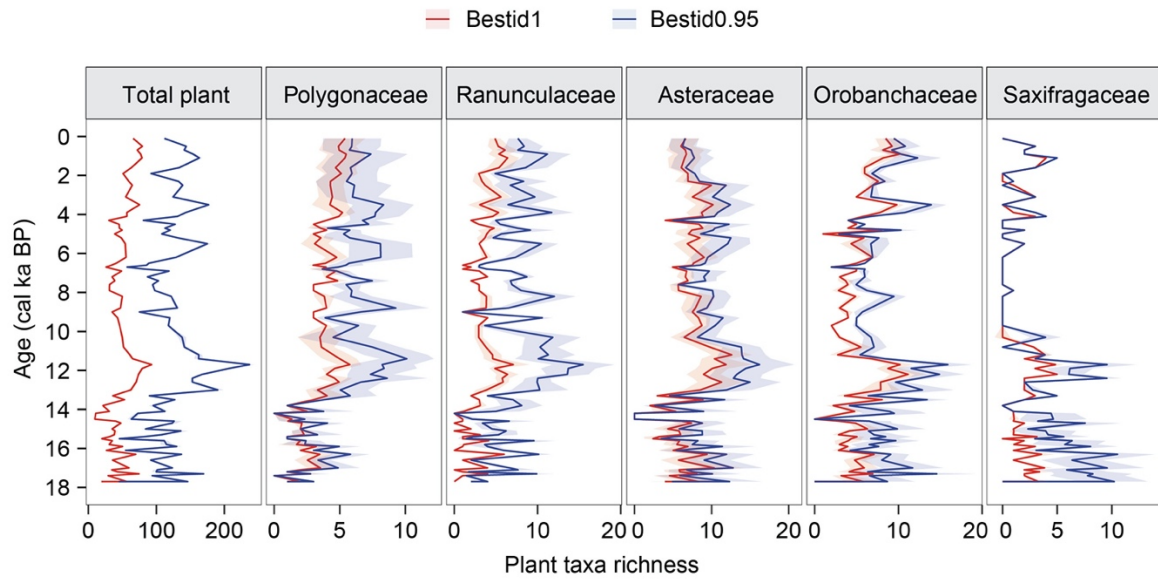

**Supplementary Figure 4 Changes in plant taxa richness using different thresholds of best identity.** Total plant taxa richness and within-family taxa richness based on sedaDNA data with 95% best identity (blue lines) compared to that of sedaDNA data with 100% best identity (red lines). Data are presented as mean  $\pm$  95% confidence interval (colour shading).

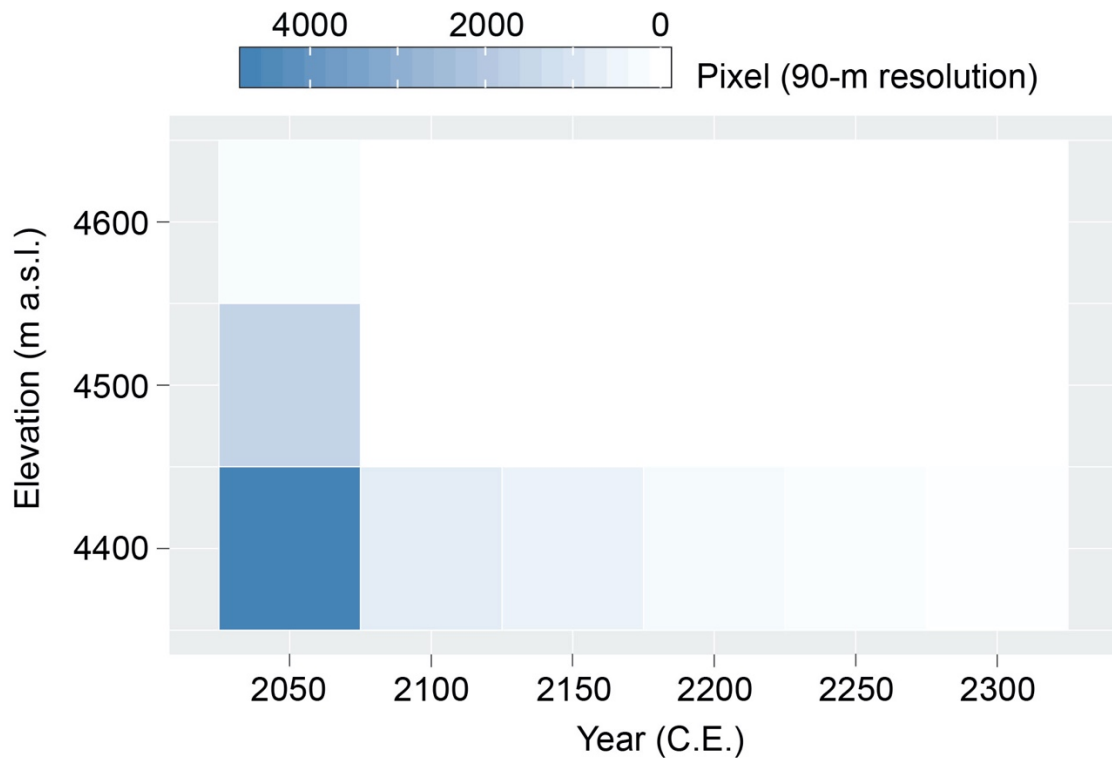

**Supplementary Figure 5 Simulated alpine habitat loss under projected 2.5 °C warming future.** Colour bar indicates the number of pixels (90-metre spatial resolution) within 100-m elevation bands above the treeline from 2050 C.E. to 2300 C.E. Source data are provided with this paper.

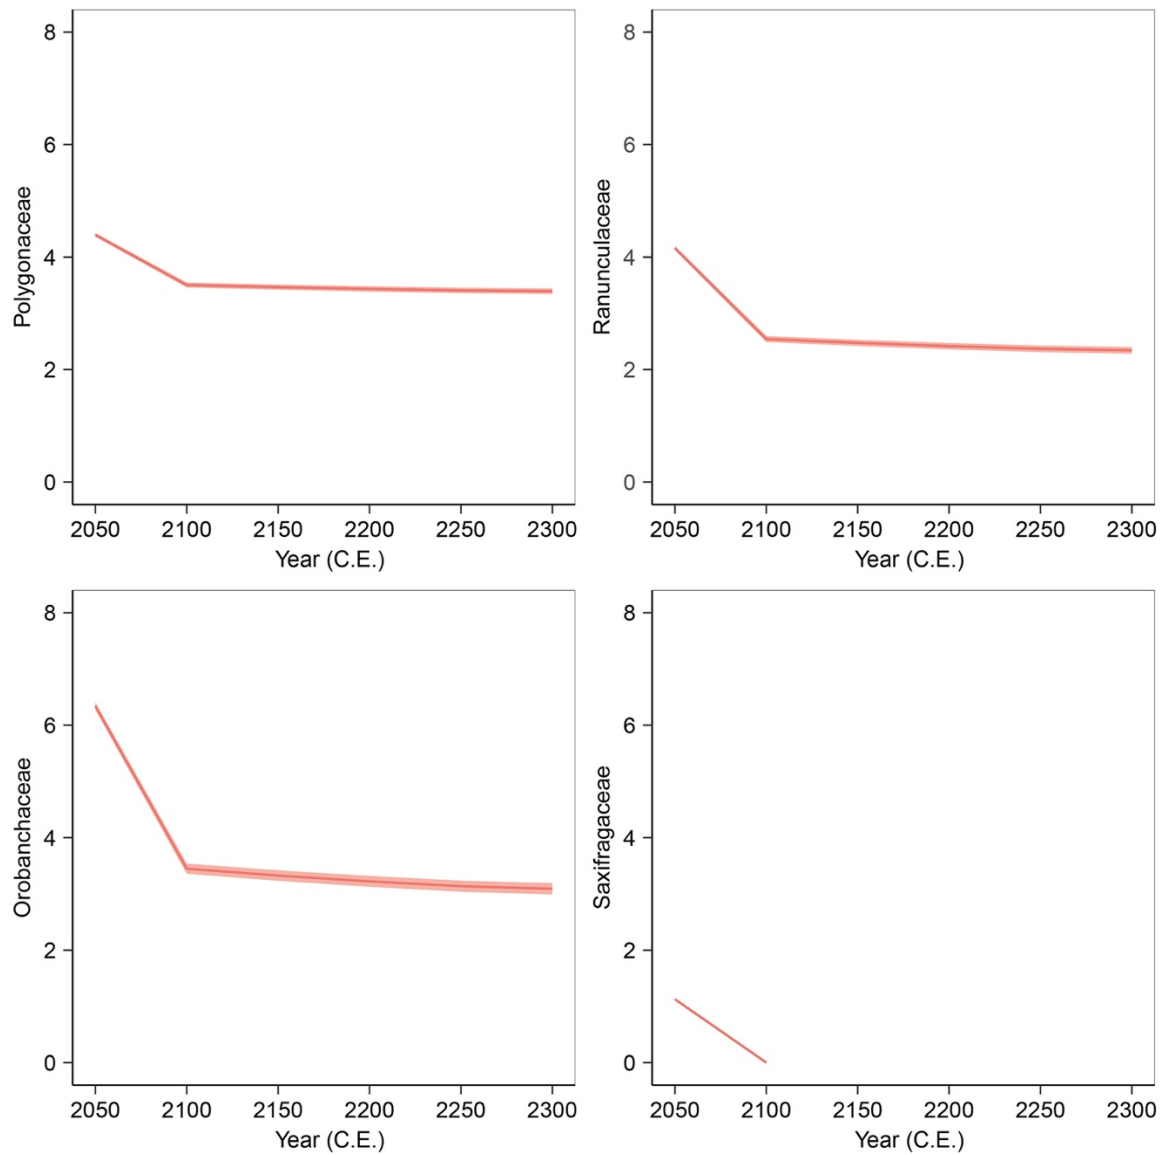

**Supplementary Figure 6 Predicted loss of alpine plant taxa richness under the ongoing climate warming.** Data are presented as mean  $\pm$  95% confidence interval (red shading).

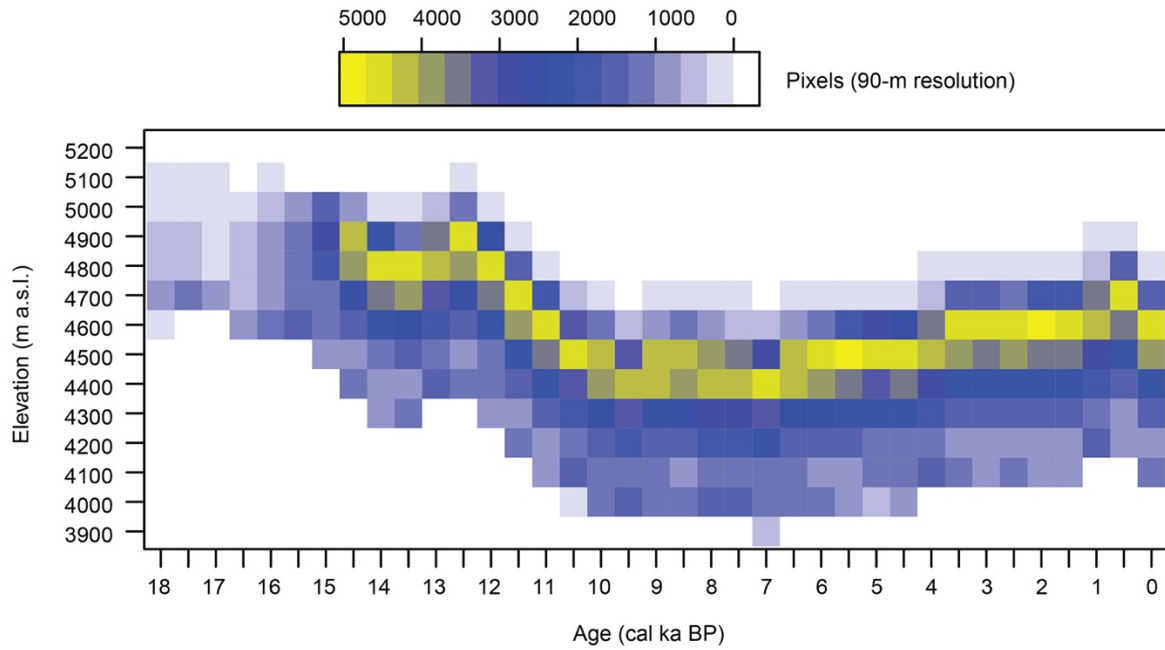

**Supplementary Figure 7 Simulated area changes of available habitats represented by present elevations within Lake Naleng catchment since 18 ka.** The available area for plant taxa in the catchment was predicted for 500-year steps based on the temperature lapse and reduced by potential glacier and permanent snow cover present at the beginning of the series. Current warming can be seen to drive changes towards warmer/lower elevations. Colour bar indicates the number of pixels (90-metre spatial resolution) within 100-m elevation bands across time. The pixels only shifted in elevational range from 3,900 to 5,200 m a.s.l. as indicated. Source data are provided with this paper.

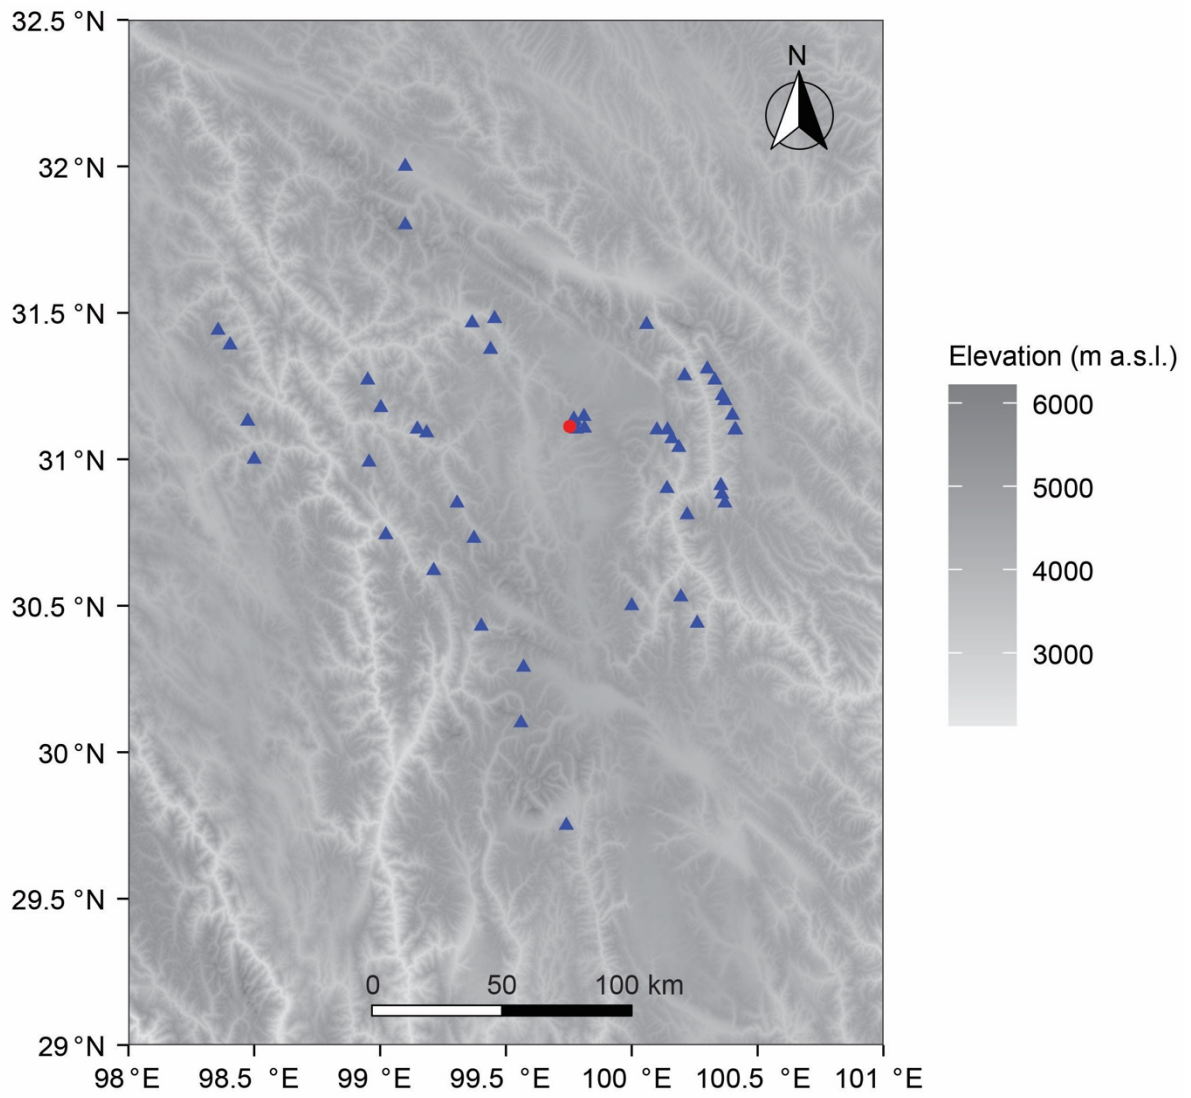

**Supplementary Figure 8** The overview of treeline location (blue triangles) around Lake Naleng (red dot).



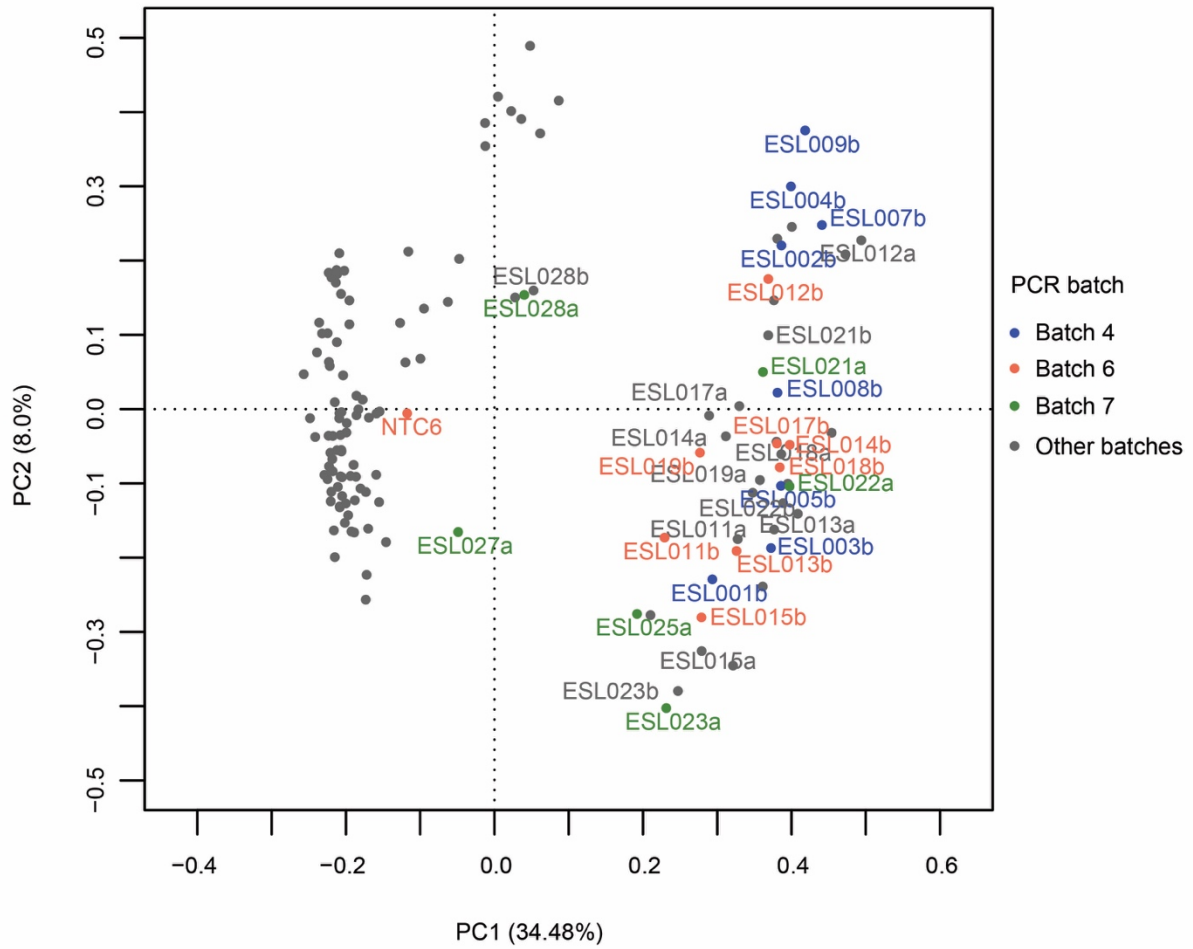

**Supplementary Figure 9** The biplot of PCA results for all PCR replicates of lake sediment samples and NTC6. PCR Batches 4, 6 and 7 were amplified with same thermal cycler simultaneously.

**Supplementary Table 1 The correlation of plant taxa richness based on different datasets indicates that the temporal variations of total plant taxa richness were accurately reflected by the data with best identity 1 in this study**

|                                     | <b>rho</b> | <b>p-value</b> | <b>df</b> |
|-------------------------------------|------------|----------------|-----------|
| <b>Bestid 1 vs. Non-ecotag data</b> | 0.768      | 5.38e-15       | 69        |
| <b>Bestid 1 vs. terSeq data</b>     | 0.830      | 3.52e-19       | 69        |
| <b>Bestid 1 vs. Bestid 0.95</b>     | 0.888      | 6.46e-25       | 69        |
| <b>Bestid 1 vs. Single data</b>     | 0.951      | 7.74e-37       | 69        |

Bestid 1: after further sequence filtering, these are terrestrial seed plant sequences that have a best identity value of 1 and are present in at least two PCRs.

Bestid 0.95: after further sequence filtering, these are terrestrial seed plant sequences that have a best identity value  $\geq 0.95$  and are present in at least two PCRs.

terSeq: all terrestrial seed plant sequences without further sequence filtering.

Non-ecotag: data before taxonomic assignment

Single data: based on Bestid 1 data, but only using deeply sequenced PCR replicates for each lake-sediment sample.

rho: Spearman's Rank correlation coefficient

p-value: two tailed without adjustment.

df: degrees of freedom

adjusted: none

For detailed information, please see Methods.

## Supplementary Table 2 Overview of Procrustes and Procrustes analyses

|                                         | <b>p-value</b> | <b>r</b> | <b>m<sup>12</sup></b> | <b>rmse</b> |
|-----------------------------------------|----------------|----------|-----------------------|-------------|
| <b>Bestid1 vs. Single data: samples</b> | 0.001          | 0.986    | 0.027                 | 0.020       |
| <b>Bestid1 vs. Single data: taxa</b>    | 0.001          | 0.993    | 0.014                 | 0.014       |

Bestid 1: after data quality control, these are terrestrial seed plant sequences that have a best identity value of 1 and are present in at least two PCRs.

Single data: based on Bestid 1 data, but only using deeply sequenced PCR replicates for each lake-sediment sample.

p-value: the smallest p-value with 999 permutations

r: Correlation in a symmetric Procrustes rotation

m<sup>12</sup>: Procrustes sum of squares

rmse: Procrustes root mean squared error

**Supplementary Table 3 Identified taxa and taxonomic resolution.** We compared number of taxa and their taxonomic resolution of sedaDNA data with pollen data from the same sediment core. Taxonomic resolution is indicated by the percentage of taxa within each proxy.

|                | No. of Samples | No. of Taxa | Taxonomic resolution (%) |         |       |          |       |           |        |
|----------------|----------------|-------------|--------------------------|---------|-------|----------|-------|-----------|--------|
|                |                |             | Subspecies               | Species | Genus | Subtribe | Tribe | Subfamily | Family |
| <b>sedaDNA</b> | 71             | 218         | 0.46                     | 31.19   | 39.45 | 2.75     | 5.50  | 8.72      | 11.93  |
| <b>Pollen</b>  | 191            | 152         | 0                        | 23.03   | 63.82 | 0        | 0     | 1.32      | 11.84  |

**Supplementary Table 4 Summary of correlation coefficients of taxa richness within the most common alpine families and selected predictor variables.**

|                      | 18-10 ka      |                  |           |             |             | 14-3.6 ka     |                  |           |             |              | 10-0 ka       |                  |           |             |              |
|----------------------|---------------|------------------|-----------|-------------|-------------|---------------|------------------|-----------|-------------|--------------|---------------|------------------|-----------|-------------|--------------|
|                      | rho           | adjusted p-value | df        | adjusted df | alpha level | rho           | adjusted p-value | df        | adjusted df | alpha level  | rho           | adjusted p-value | df        | adjusted df | alpha level  |
| <b>Polygonaceae</b>  |               |                  |           |             |             |               |                  |           |             |              |               |                  |           |             |              |
| Total habitat        | <b>0.693</b>  | <b>1.13e-05</b>  | <b>34</b> | <b>10</b>   | <b>.025</b> | /             | /                | /         | /           | /            | /             | /                | /         | /           | /            |
| Temperature          | <b>0.673</b>  | <b>2.77e05</b>   | <b>34</b> | <b>11</b>   | <b>.025</b> | -0.276        | 0.394            | 35        | 13          | .25          | <b>-0.882</b> | <b>1.05e-11</b>  | <b>33</b> | <b>12</b>   | <b>.0005</b> |
| Glacier's decay      | <b>-0.634</b> | <b>3.86e-04</b>  | <b>30</b> | <b>13</b>   | <b>.025</b> | /             | /                | /         | /           | /            | /             | /                | /         | /           | /            |
| Alpine habitat       | /             | /                | /         | /           | /           | 0.277         | 0.386            | 35        | 13          | .25          | <b>0.908</b>  | <b>1.92e-13</b>  | <b>33</b> | <b>11</b>   | <b>.0005</b> |
| Mg/Ca ratio          | <b>0.706</b>  | <b>6.17e-06</b>  | <b>34</b> | <b>11</b>   | <b>.025</b> | 0.190         | 1.000            | 35        | 12          | >.25         | 0.117         | 1.000            | 33        | 11          | >.25         |
| Land-use             | /             | /                | /         | /           | /           | /             | /                | /         | /           | /            | <b>0.937</b>  | <b>4.83e-16</b>  | <b>33</b> | <b>11</b>   | <b>.0005</b> |
| <b>Ranunculaceae</b> |               |                  |           |             |             |               |                  |           |             |              |               |                  |           |             |              |
| Total habitat        | <b>0.605</b>  | <b>3.67e-04</b>  | <b>34</b> | <b>10</b>   | <b>.05</b>  | /             | /                | /         | /           | /            | /             | /                | /         | /           | /            |
| Temperature          | <b>0.582</b>  | <b>7.93e-04</b>  | <b>34</b> | <b>11</b>   | <b>.05</b>  | <b>-0.731</b> | <b>1.13e-07</b>  | <b>35</b> | <b>11</b>   | <b>.01</b>   | <b>-0.954</b> | <b>2.79e-18</b>  | <b>33</b> | <b>11</b>   | <b>.0005</b> |
| Glacier's decay      | -0.265        | 0.573            | 30        | 13          | .25         | /             | /                | /         | /           | /            | /             | /                | /         | /           | /            |
| Alpine habitat       | /             | /                | /         | /           | /           | <b>0.739</b>  | <b>7.14e-07</b>  | <b>35</b> | <b>11</b>   | <b>.01</b>   | <b>0.982</b>  | <b>5.78e-25</b>  | <b>33</b> | <b>11</b>   | <b>.0005</b> |
| Mg/Ca ratio          | <b>0.688</b>  | <b>1.43e-05</b>  | <b>34</b> | <b>11</b>   | <b>.025</b> | 0.384         | 0.075            | 35        | 11          | .25          | 0.184         | 1.000            | 33        | 11          | >.25         |
| Land-use             | /             | /                | /         | /           | /           | /             | /                | /         | /           | /            | <b>0.935</b>  | <b>7.99e-16</b>  | <b>33</b> | <b>11</b>   | <b>.0005</b> |
| <b>Asteraceae</b>    |               |                  |           |             |             |               |                  |           |             |              |               |                  |           |             |              |
| Total habitat        | 0.283         | 0.379            | 34        | 10          | .25         | /             | /                | /         | /           | /            | /             | /                | /         | /           | /            |
| Temperature          | 0.261         | 0.498            | 34        | 11          | .25         | -0.428        | 0.33             | 35        | 11          | .10          | -0.032        | 1.000            | 33        | 13          | >.25         |
| Glacier's decay      | <b>-0.704</b> | <b>2.76e-05</b>  | <b>30</b> | <b>13</b>   | <b>.005</b> | /             | /                | /         | /           | /            | /             | /                | /         | /           | /            |
| Alpine habitat       | /             | /                | /         | /           | /           | 0.431         | 0.031            | 35        | 11          | .10          | 0.058         | 1.000            | 33        | 12          | >.25         |
| Mg/Ca ratio          | 0.354         | 0.137            | 34        | 11          | .25         | 0.452         | 0.020            | 35        | 11          | .10          | 0.325         | 0.227            | 33        | 13          | .25          |
| Land-use             | /             | /                | /         | /           | /           | /             | /                | /         | /           | /            | -0.064        | 1.000            | 33        | 13          | >.25         |
| <b>Orobanchaceae</b> |               |                  |           |             |             |               |                  |           |             |              |               |                  |           |             |              |
| Total habitat        | <b>0.572</b>  | <b>0.001</b>     | <b>34</b> | <b>10</b>   | <b>.05</b>  | /             | /                | /         | /           | /            | /             | /                | /         | /           | /            |
| Temperature          | 0.520         | 0.005            | 34        | 11          | .10         | <b>-0.871</b> | <b>9.15e-12</b>  | <b>35</b> | <b>11</b>   | <b>.001</b>  | <b>-0.896</b> | <b>1.32e-12</b>  | <b>33</b> | <b>11</b>   | <b>.0005</b> |
| Glacier's decay      | <b>-0.699</b> | <b>3.47e-05</b>  | <b>30</b> | <b>12</b>   | <b>.01</b>  | /             | /                | /         | /           | /            | /             | /                | /         | /           | /            |
| Alpine habitat       | /             | /                | /         | /           | /           | <b>0.879</b>  | <b>3.41e-12</b>  | <b>35</b> | <b>11</b>   | <b>.0005</b> | <b>0.918</b>  | <b>3.67e-14</b>  | <b>33</b> | <b>11</b>   | <b>.0005</b> |
| Mg/Ca ratio          | <b>0.585</b>  | <b>0.001</b>     | <b>34</b> | <b>10</b>   | <b>.05</b>  | 0.339         | 0.161            | 35        | 10          | .25          | 0.007         | 1.000            | 33        | 11          | >.25         |
| Land-use             | /             | /                | /         | /           | /           | /             | /                | /         | /           | /            | <b>0.969</b>  | <b>6.23e-21</b>  | <b>33</b> | <b>11</b>   | <b>.0005</b> |
| <b>Saxifragaceae</b> |               |                  |           |             |             |               |                  |           |             |              |               |                  |           |             |              |
| Total habitat        | 0.002         | 1.000            | 34        | 11          | >.25        | /             | /                | /         | /           | /            | /             | /                | /         | /           | /            |
| Temperature          | -0.031        | 1.000            | 34        | 11          | >.25        | <b>-0.889</b> | <b>7.70e-13</b>  | <b>35</b> | <b>11</b>   | <b>.0005</b> | <b>-0.915</b> | <b>5.75e-14</b>  | <b>33</b> | <b>11</b>   | <b>.0005</b> |
| Glacier's decay      | <b>-0.496</b> | <b>0.016</b>     | <b>30</b> | <b>13</b>   | <b>.05</b>  | /             | /                | /         | /           | /            | /             | /                | /         | /           | /            |
| Alpine habitat       | /             | /                | /         | /           | /           | <b>0.900</b>  | <b>1.48e-13</b>  | <b>35</b> | <b>11</b>   | <b>.0005</b> | <b>0.939</b>  | <b>3.23e-16</b>  | <b>33</b> | <b>10</b>   | <b>.0005</b> |
| Mg/Ca ratio          | 0.154         | 1.000            | 34        | 11          | >.25        | <b>0.496</b>  | <b>0.007</b>     | <b>35</b> | <b>10</b>   | <b>.10</b>   | 0.113         | 1.000            | 33        | 11          | >.25         |
| Land-use             | /             | /                | /         | /           | /           | /             | /                | /         | /           | /            | <b>0.949</b>  | <b>1.73e-17</b>  | <b>33</b> | <b>11</b>   | <b>.0005</b> |

rho: Spearman's Rank correlation coefficient

adjusted p-value: two tailed with Bonferroni adjustment

df: degrees of freedom

adjusted df: adjusted degrees of freedom

alpha level: Directional alpha levels of critical values for Spearman's Rank correlation coefficient

/: not a predictor variable in corresponding time transition

predictor variable with alpha level  $\leq 0.05$  was in bold.

**Supplementary Table 5 Summary of generalised linear model (GLM) diagnostics for total plant taxa richness and taxa richness within the most common alpine families during 10–0 ka.**

| Family         | Model      | Formula                                     | AIC    | Deviance explained of model (%) | P-value and correlation                      | varImp(): variable importance |
|----------------|------------|---------------------------------------------|--------|---------------------------------|----------------------------------------------|-------------------------------|
| Total richness | Null model | sRichness ~ 1, family = gaussian,           | 277.73 | 0                               | NA                                           | NA                            |
|                | model 1    | sRichness ~ Aa, family = gaussian,          | 166.74 | 96.04                           | 1.03E-24 ***/+                               | NA                            |
|                | model 2    | sRichness ~ sHuman, family = gaussian,      | 210.14 | 86.31                           | 8.25E-16 ***/+                               | NA                            |
|                | model 3    | sRichness ~ Aa + sHuman, family = gaussian, | 163.98 | 96.54                           | Aa: 4.39E-11 ***/+<br>sHuman: 0.038 */+      | Aa: 9.73<br>sHuman: 2.16      |
|                | model 4    | backwards = step(model3)                    | 163.98 | 96.54                           | sHuman: 0.038 */+<br>Aa: 4.39E-11 ***/+      | sHuman: 2.16<br>Aa: 9.73      |
| Orobanchaceae  | Null model | sRichness ~ 1, family = gaussian,           | 140.62 | 0                               | NA                                           | NA                            |
|                | model 1    | sRichness ~ Aa, family = gaussian,          | 27.59  | 96.26                           | 3.95E-25 ***/+                               | NA                            |
|                | model 2    | sRichness ~ sHuman, family = gaussian,      | 75.21  | 85.43                           | 2.35E-15 ***/+                               | NA                            |
|                | model 3    | sRichness ~ Aa + sHuman, family = gaussian, | 26.50  | 96.58                           | Aa: 1.35E-11 ***/+<br>sHuman: 0.095 /+       | Aa: 10.21<br>sHuman: 1.72     |
|                | model 4    | backwards = step(model3)                    | 26.50  | 96.58                           | sHuman: 0.095 /+<br>Aa: 1.35E-11 ***/+       | sHuman: 1.72<br>Aa: 10.21     |
| Polygonaceae   | Null model | sRichness ~ 1, family = gaussian,           | 60.29  | 0                               | NA                                           | NA                            |
|                | model 1    | sRichness ~ Aa, family = gaussian,          | -21.51 | 90.88                           | 1.01E-18 ***/+                               | NA                            |
|                | model 2    | sRichness ~ sHuman, family = gaussian,      | -51.17 | 96.09                           | 8.28E-25 ***/+                               | NA                            |
|                | model 3    | sRichness ~ Aa + sHuman, family = gaussian, | -69.87 | 97.84                           | Aa: 1.57E-05 ***/+<br>sHuman: 1.59E-11 ***/+ | Aa: 5.08<br>sHuman: 10.14     |
|                | model 4    | backwards = step(model3)                    | -69.87 | 97.84                           | sHuman: 1.59E-11 ***/+<br>Aa: 1.57E-05 ***/+ | sHuman: 10.14<br>Aa: 5.08     |
| Ranunculaceae  | Null model | sRichness ~ 1, family = gaussian,           | 100.10 | 0                               | NA                                           | NA                            |
|                | model 1    | sRichness ~ Aa, family = gaussian,          | -8.76  | 95.79                           | 2.82E-24 ***/+                               | NA                            |
|                | model 2    | sRichness ~ sHuman, family = gaussian,      | 45.45  | 80.19                           | 3.84E-13 ***/+                               | NA                            |
|                | model 3    | sRichness ~ Aa + sHuman, family = gaussian, | -6.87  | 95.80                           | Aa: 2.58E-12 ***/+<br>sHuman: 0.755/+        | Aa: 10.91<br>sHuman: 0.31     |
|                | model 4    | backwards = step(model3)                    | -6.87  | 95.80                           | sHuman: 0.755/+<br>Aa: 2.58E-12 ***/+        | sHuman: 0.31<br>Aa: 10.91     |
| Saxifragaceae  | Null model | sRichness ~ 1, family = gaussian,           | 76.40  | 0                               | NA                                           | NA                            |
|                | model 1    | sRichness ~ Aa, family = gaussian,          | -21.94 | 94.31                           | 4.04E-22 ***/+                               | NA                            |
|                | model 2    | sRichness ~ sHuman, family = gaussian,      | 28.07  | 76.26                           | 7.75E-12 ***/+                               | NA                            |
|                | model 3    | sRichness ~ Aa + sHuman, family = gaussian, | -21.53 | 94.57                           | Aa: 9.00E-12 ***/+<br>sHuman: 0.2326/+       | Aa: 10.38<br>sHuman: 1.22     |
|                | model 4    | backwards = step(model3)                    | -21.53 | 94.57                           | sHuman: 0.2326/+<br>Aa: 9.00E-12 ***/+       | sHuman: 1.22<br>Aa: 10.38     |

sRichness: smoothed data of plant taxa richness  
sHuman: smoothed data of grazing indicator  
Aa: alpine habitat area  
Significance codes: \*\*\* 0.001, \*\* 0.01, \* 0.05  
Correlation code: all correlations are positive (+)  
NA: no data/without calculation

**Supplementary Table 6 List of primers used for plant sedaDNA amplification**

| DNA region                | Name | Sequence 5'-3'         | Amplicon length range (bp) |
|---------------------------|------|------------------------|----------------------------|
| <i>trnL</i> (UAA) P6 loop | g    | GGGCAATCCTGAGCCAA      | 10-143 bp                  |
|                           | h    | CCATTGAGTCTCTGCACCTATC |                            |

**Supplementary Table 7 The geographic information of treeline location around Lake Naleng**

| ID             | Latitude / °N | Longitude/ °E | Elevation/ m a.s.l. | Source                   |
|----------------|---------------|---------------|---------------------|--------------------------|
| Shaluli Shan S | 29.75         | 99.74         | 4200                | Publication <sup>1</sup> |
| NE of Batang   | 30.1          | 99.56         | 4500                | Publication <sup>1</sup> |
| Haizi Shan     | 30.29         | 99.57         | 4200                | Publication <sup>1</sup> |
| Chola Shan     | 32            | 99.1          | 4200                | Publication <sup>2</sup> |
| NW of Litang   | 30.5          | 100           | 4650                | Publication <sup>3</sup> |
| SE of Zoggen   | 31.8          | 99.1          | 4350                | Publication <sup>3</sup> |
| Gonjo-Jundah   | 31            | 98.5          | 3900                | Publication <sup>4</sup> |
| 1              | 31.13         | 99.77         | 4365                | Google Earth             |
| 2              | 31.13425      | 99.77         | 4404                | Google Earth             |
| 3              | 31.137        | 99.77         | 4355                | Google Earth             |
| 4              | 31.146        | 99.81         | 4424                | Google Earth             |
| 5              | 31.103        | 99.78         | 4398                | Google Earth             |
| 6              | 31.106        | 99.812        | 4435                | Google Earth             |
| 7              | 31.46         | 100.059       | 4335                | Google Earth             |
| 8              | 31.285        | 100.21        | 4396                | Google Earth             |
| 9              | 31.308        | 100.3         | 4520                | Google Earth             |
| 10             | 31.27         | 100.33        | 4502                | Google Earth             |
| 11             | 31.217        | 100.36        | 4512                | Google Earth             |
| 12             | 31.2          | 100.37        | 4362                | Google Earth             |
| 13             | 31.15         | 100.4         | 4342                | Google Earth             |
| 14             | 31.1          | 100.41        | 4341                | Google Earth             |
| 15             | 31.1          | 100.413       | 4377                | Google Earth             |
| 16             | 30.91         | 100.354       | 4203                | Google Earth             |
| 17             | 30.88         | 100.358       | 4396                | Google Earth             |
| 18             | 30.85         | 100.37        | 4222                | Google Earth             |
| 19             | 31.1          | 100.1         | 4125                | Google Earth             |
| 20             | 31.1          | 100.142       | 4521                | Google Earth             |
| 21             | 31.07         | 100.159       | 4323                | Google Earth             |
| 22             | 31.04         | 100.186875    | 4386                | Google Earth             |
| 23             | 30.9          | 100.14        | 4267                | Google Earth             |
| 24             | 30.81         | 100.22        | 4493                | Google Earth             |
| 25             | 30.53         | 100.195       | 4388                | Google Earth             |
| 26             | 30.44         | 100.26        | 4516                | Google Earth             |
| 27             | 30.43         | 99.402        | 4434                | Google Earth             |
| 28             | 30.62         | 99.213        | 4445                | Google Earth             |
| 29             | 30.73         | 99.373        | 4280                | Google Earth             |
| 30             | 30.85         | 99.306        | 4427                | Google Earth             |
| 31             | 30.742        | 99.0229       | 4250                | Google Earth             |
| 32             | 30.99         | 98.956        | 4245                | Google Earth             |
| 33             | 31.09         | 99.185        | 4462                | Google Earth             |
| 34             | 31.103        | 99.148        | 4402                | Google Earth             |
| 35             | 31.176        | 99.003        | 4264                | Google Earth             |
| 36             | 31.27         | 98.9507       | 4194                | Google Earth             |
| 37             | 31.4657       | 99.366        | 4102                | Google Earth             |
| 38             | 31.48         | 99.455        | 4305                | Google Earth             |
| 39             | 31.3749       | 99.4387       | 4265                | Google Earth             |
| 40             | 31.13         | 98.474        | 4329                | Google Earth             |
| 41             | 31.39         | 98.404        | 4429                | Google Earth             |
| 42             | 31.44         | 98.3562       | 4526                | Google Earth             |



### References Supplementary Table 7:

1. Yao, Y. & Zhang, B. The mass elevation effect of the Tibetan Plateau and its implications for Alpine treelines. *Int. J. Climatol* **35**, 1833–1846 (2015).
2. Jiang, F., Wu, X., Wang, S., Fu, J., Wang, Y. Features of space distribution of the forest line and relations between the forest line and climatic limit of permafrost and climatic snowline in China (in Chinese). *J. Geomech.* **10**, 289–299 (2004).
3. Schickhoff, U. The Upper Timberline in the Himalayas, Hindu Kush and Karakorum: a Review of Geographical and Ecological Aspects. in *Mountain Ecosystems* (eds. Broll, G. & Keplin, B.) 275–354 (Springer-Verlag, 2005).
4. Zhang, J.W., Chen, W.J., Li, W., Zhao, B.K. *The Vegetation of Xizang* (in Chinese). (Science Press: Beijing, 1988)
