# Supplementary material for: Sedimentary ancient DNA reveals a threat of warming-induced alpine habitat loss to Tibetan Plateau plant diversity
Source: PubMed Central journal article supplement (PMC8137883; doi:10.1038/s41467-021-22986-4), 2021-05-20
Supplement: 41467_2021_22986_MOESM3_ESM.pdf [file 41467_2021_22986_MOESM3_ESM.pdf]

## **Description of Additional Supplementary Files**

File Name: Supplementary Data 1

Description: The bestid 1 dataset

File Name: Supplementary Data 2

Description: The bestid 0.95 dataset

File Name: Supplementary Data 3

Description: Data for statistical analysis

File Name: Supplementary Code 1

Description: Rarefaction

File Name: Supplementary Code 2

Description: Taxa turnover

File Name: Supplementary Code 3

Description: Multiple correlation

File Name: Supplementary Code 4

Description: Adjust df

File Name: Supplementary Code 5

Description: GLMs and prediction
